# Supplementary material
Source: PubMed Central journal article supplement (PMC1635675)
Supplement: biophysj_106.081661_1.pdf [file biophysj_106.081661_1.pdf]

## SUPPLEMENTAL MATERIAL

TABLE I: parameters in G-protein cycle

| parameter | value                  | References and Notes                                |
|-----------|------------------------|-----------------------------------------------------|
| k1        | $0.12nM^{-1}min^{-1}$  | $2 \times 10^6 M^{-1}s^{-1}$ (12)                   |
| k2        | $0.6min^{-1}$          | $0.01 s^{-1}$ (12)                                  |
| k3        | $0.24min^{-1}$         | $4 \times 10^{-3}s^{-1}$ (12)                       |
| k4        | $320nM \cdot min^{-1}$ | fit to the time-course of G protein activation      |
| k5        | 7 nM                   | (12).(See Fig.2A )                                  |
| k6        | $30nM \cdot min^{-1}$  | $4(molecules/cell)s^{-1}$ (12)                      |
| k7        | $0.024min^{-1}$        | $4 \times 10^{-4}s^{-1}$ (12)                       |
| k8        | $0.0048min^{-1}$       | $10^{-5}(molecules/cell)^{-1}s^{-1}$ (12)           |
| k9        | $115nM \cdot min^{-1}$ | fit to the time-course of G protein activation      |
| k10       | 60 nM                  | (12)(See Fig.2A),                                   |
| k11       | $20nM \cdot min^{-1}$  | and experimental data that G protein increased from |
| k12       | $0.08min^{-1}$         | 8000 molecules/cell to 12000 molecules/cell (8)     |
| k13       | $0.24min^{-1}$         | $4 \times 10^{-3}s^{-1}$ (12)                       |
| k14       | $0.025nM^{-1}min^{-1}$ | $0.11s^{-1}$ (12)                                   |
| k15       | $480nM^{-1}min^{-1}$   | $1(molecule/cell)^{-1}s^{-1}$ (12)                  |

TABLE II: parameters in recruitment of scaffolds

| parameter | value                    | References and Notes                                                                                                                                                      |
|-----------|--------------------------|---------------------------------------------------------------------------------------------------------------------------------------------------------------------------|
| k16       | $0.05nM^{-1}min^{-1}$    | $t_{1/2} = 8.22s$ for Ste5s' recovery<br>at shmoo tips (49)                                                                                                               |
| k17       | $5min^{-1}$              |                                                                                                                                                                           |
| k18       | $0.00007nM^{-1}min^{-1}$ | fit to (24)                                                                                                                                                               |
| k19       | $0.001min^{-1}$          | (See Fig.2C. )                                                                                                                                                            |
| k22       | $0.3min^{-1}$            | Ste5 undergoes continuous shuttle without<br>pheromone induction, and yet most are se-<br>questered in the nucleus. Thus, the exportation<br>speed is assumed to be slow. |
| k23       | $30min^{-1}$             | $t_{1/2} = 2s$ for the recovery of ste5 in the nucleus.<br>(49)                                                                                                           |

TABLE III: dephosphorylation

| protein       | a1<br>( $nM^{-1}min^{-1}$ ) | d1<br>( $min^{-1}$ ) | p1<br>( $min^{-1}$ ) | a2<br>( $nM^{-1}min^{-1}$ ) | d2<br>( $min^{-1}$ ) | p2<br>( $min^{-1}$ ) |
|---------------|-----------------------------|----------------------|----------------------|-----------------------------|----------------------|----------------------|
| Ste11(MAPKKK) | 0.5                         | 24                   | 10                   | 1                           | 24                   | 10                   |
| Ste7(MAPKK)   | 0.5                         | 24                   | 10                   | 0.5                         | 24                   | 10                   |
| Fus3(MAPK)    | 0.2                         | 10                   | 30                   | 0.4                         | 20                   | 30                   |

TABLE IV: phosphorylation in cytosol

| protein     | a3<br>( $nM^{-1}min^{-1}$ ) | d3<br>( $min^{-1}$ ) | p3<br>( $min^{-1}$ ) | a4<br>( $nM^{-1}min^{-1}$ ) | d4<br>( $min^{-1}$ ) | p4<br>( $min^{-1}$ ) |
|-------------|-----------------------------|----------------------|----------------------|-----------------------------|----------------------|----------------------|
| Ste7(MAPKK) | 1                           | 36                   | 10                   | 1                           | 36                   | 10                   |
| Fus3(MAPK)  | 0.1                         | 36                   | 10                   | 0.1                         | 36                   | 10                   |

Notes: Equations of reaction in this part are all in the following form:  $S + E \xrightleftharpoons[d_n]{a_n} SE \xrightarrow{p_n} S^* + E$ .

As for the underset n:

1: dephosphorylation of the once phosphorylated kinase; 2: dephosphorylation of the twice phosphorylated kinase; 3: once phosphorylation; 4: twice phosphorylation. Parameters are estimated in analogy to Ref.11.

TABLE V: Other reactions in the cytosol

| parameter | value                    | References |
|-----------|--------------------------|------------|
| k24       | $1.2 nM^{-1}min^{-1}$    | Ref.23     |
| k25       | $24min^{-1}$             | Ref.23     |
| k26       | $0.0015 nM^{-1}min^{-1}$ | Ref.40     |
| k27       | $0.1 min^{-1}$           | Ref.41     |

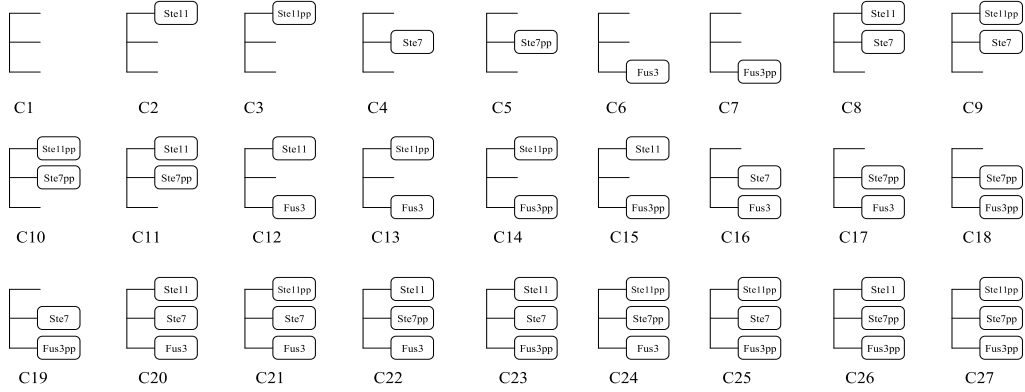

FIG. 1: 27 kinds of scaffold-kinase complexes

|                                          |                                          |                                          |
|------------------------------------------|------------------------------------------|------------------------------------------|
| $C1 + MEKK \rightleftharpoons C2$        | $C1 + MEKK^{**} \rightleftharpoons C3$   | $C1 + MEK \rightleftharpoons C4$         |
| $C1 + MEK^{**} \leftarrow C5$            | $C1 + MAPK \rightleftharpoons C6$        | $C1 + MAPK^{**} \leftarrow C7$           |
| $C2 \rightarrow C3$                      | $C2 + MEK \rightleftharpoons C8$         | $C2 + MEK^{**} \leftarrow C11$           |
| $C2 + MAPK \rightleftharpoons C12$       | $C2 + MAPK^{**} \leftarrow C15$          | $C3 + MEK \rightleftharpoons C9$         |
| $C3 + MEK^{**} \leftarrow C10$           | $C3 + MAPK \rightleftharpoons C13$       | $C3 + MAPK^{**} \leftarrow C14$          |
| $C4 + MEKK \rightleftharpoons C8$        | $C4 + MEKK^{**} \rightleftharpoons C9$   | $C4 + MAPK \rightleftharpoons C16$       |
| $C4 + MAPK^{**} \leftarrow C19$          | $C5 + MEKK^{**} \rightleftharpoons C10$  | $C5 + MEKK \rightleftharpoons C11$       |
| $C5 + MAPK \rightleftharpoons C17$       | $C5 + MAPK^{**} \leftarrow C18$          | $C6 + MEKK \rightleftharpoons C12$       |
| $C6 + MEKK^{**} \rightleftharpoons C13$  | $C6 + MEK \rightleftharpoons C16$        | $C6 + MEK^{**} \leftarrow C17$           |
| $C7 + MEKK^{**} \rightleftharpoons C14$  | $C7 + MEKK \rightleftharpoons C15$       | $C7 + MEK^{**} \leftarrow C18$           |
| $C7 + MEK \rightleftharpoons C19$        | $C8 \rightarrow C9$                      | $C8 + MAPK \rightleftharpoons C20$       |
| $C8 + MAPK^{**} \leftarrow C23$          | $C9 \rightarrow C10$                     | $C9 + MAPK \rightleftharpoons C21$       |
| $C9 + MAPK^{**} \leftarrow C25$          | $C10 \leftarrow C11$                     | $C10 + MAPK \rightleftharpoons C24$      |
| $C10 + MAPK^{**} \leftarrow C27$         | $C11 + MAPK \rightleftharpoons C22$      | $C11 + MAPK^{**} \leftarrow C26$         |
| $C12 \leftarrow C13$                     | $C12 + MEK \rightleftharpoons C20$       | $C12 + MEK^{**} \leftarrow C22$          |
| $C13 + MEK \rightleftharpoons C21$       | $C13 + MEK^{**} \leftarrow C24$          | $C14 \leftarrow C15$                     |
| $C14 + MEK \rightleftharpoons C25$       | $C14 + MEK^{**} \leftarrow C27$          | $C15 + MEK \rightleftharpoons C23$       |
| $C15 + MEK^{**} \leftarrow C26$          | $C16 + MEKK^{**} \rightleftharpoons C21$ | $C16 + MEKK \rightleftharpoons C20$      |
| $C17 \rightarrow C18$                    | $C17 + MEKK^{**} \rightleftharpoons C24$ | $C17 + MEKK \rightleftharpoons C22$      |
| $C18 + MEKK^{**} \rightleftharpoons C27$ | $C18 + MEKK \rightleftharpoons C26$      | $C19 + MEKK^{**} \rightleftharpoons C25$ |
| $C19 + MEKK \rightleftharpoons C23$      | $C20 \rightarrow C21$                    | $C21 \rightarrow C24$                    |
| $C22 \rightarrow C24$                    | $C22 \rightarrow C26$                    | $C23 \rightarrow C25$                    |
| $C24 \rightarrow C27$                    | $C25 \rightarrow C27$                    | $C26 \rightarrow C27$                    |

TABLE VI: parameters in MAPK cascade on scaffold

| Protein               | on<br>( $nM^{-1} \text{min}^{-1}$ ) | off<br>( $\text{min}^{-1}$ ) | **on<br>( $nM^{-1} \text{min}^{-1}$ ) | **off<br>( $\text{min}^{-1}$ ) | phosphorylation<br>( $\text{min}^{-1}$ ) | References and notes                                                                                                     |
|-----------------------|-------------------------------------|------------------------------|---------------------------------------|--------------------------------|------------------------------------------|--------------------------------------------------------------------------------------------------------------------------|
| Ste11<br>(MAP<br>KKK) | 1.2                                 | 10                           | 1                                     | 10                             | 20                                       | Ste11pp can rebind to the scaffold (27)                                                                                  |
| Ste7<br>(MAP<br>KK)   | 1.2                                 | 0.1                          | -                                     | 0.5;<br>20                     | 46                                       | Ste7pp in the scaffold undergoes hyperphosphorylation by Fus3pp, which accelerates Ste7's dissociation from the scaffold |
| Fus3<br>(MAPK)        | 1.2                                 | 10                           | -                                     | 200                            | 250                                      | $t_{1/2} = 0.3s$ for the recovery of Fuspp in shmoo tips(10,57)                                                          |

TABLE VII: parameters in downstream reactions

| protein | value                 | References and Notes                                     |
|---------|-----------------------|----------------------------------------------------------|
| k28     | $6nMmin^{-1}$         |                                                          |
| k29     | $40nM$                |                                                          |
| k30     | $0.01min^{-1}$        |                                                          |
| k31     | $0.5nMmin^{-1}$       |                                                          |
| k32     | $10nM$                |                                                          |
| k33     | $2nMmin^{-1}$         |                                                          |
| k34     | $7nM$                 |                                                          |
| k35     | $0.002min^{-1}$       |                                                          |
| k36     | $8nM^{-1}min^{-1}$    |                                                          |
| k37     | $1min^{-1}$           |                                                          |
| k38     | $10min^{-1}$          |                                                          |
| k39     | $10min^{-1}$          |                                                          |
| k40     | $0.1nM^{-1}min^{-1}$  |                                                          |
| k41     | $0.01min^{-1}$        |                                                          |
| k42     | $0.01nM^{-1}min^{-1}$ |                                                          |
| k43     | $0.1min^{-1}$         |                                                          |
| k44     | $32nMmin^{-1}$        | fit the time course of Sst2 determined in experiment (8) |
| k45     | $1nM$                 | the same as k44                                          |
| k46     | $0.052min^{-1}$       | the sam as k44                                           |
| k47     | $10min^{-1}$          | $t_{1/2} = 4s$ for the recovery of Fus3in nucleus (57)   |
| k48     | $14min^{-1}$          | $[Fus3_{in}]/[Fus3_{out}] = 1.4$ at $t = 0$ (45)         |
| k49     | $8min^{-1}$           | $[Fus3_{in}]/[Fus3_{out}] = 2$ after 60 min treatment of |
| k50     | $15min^{-1}$          | $\alpha$ -factor (45)                                    |

TABLE VIII: initial amount of proteins

| Protein      | value(nM) | notes and references                                                      |
|--------------|-----------|---------------------------------------------------------------------------|
| Ste2         | 1000      | 8000 mole/cell (8)                                                        |
| Sst2         | 250       | 2000 mole/cell (8)                                                        |
| G protein    | 1000      | 8000 mole/cell (8)                                                        |
| Ste20        | 1000      |                                                                           |
| Ste11        | 200       | less than 2000 mole/cell(1)                                               |
| Fus3Ste7     | 200       | Total amount of Ste7 should be less than 2000 mole/cell, and about 95% of |
| Ste7         | 10        | Ste7 is in the form of Fus3Ste7 before pheromone induction (1)            |
| $Fus3_{in}$  | 700       | about 5000 mole/cell (1), and before pheromone                            |
| $Fus3_{out}$ | 300       | induction, $[Fus3_{in}]/[Fus3_{out}] = 1.4$ (45)                          |
| MEKK-P       | 100       |                                                                           |
| MEK-P        | 100       |                                                                           |
| MAPK-Pin     | 100       |                                                                           |
| MAPK-Pout    | 100       |                                                                           |
| Ste5in       | 125       | (1)                                                                       |
| Ste5out      | 0.1       |                                                                           |
| Cdc28        | 100       |                                                                           |

TABLE IX: mutants

| No. | Mutant                                                            | Behavior                                           | Implementation                                                                | Reference |
|-----|-------------------------------------------------------------------|----------------------------------------------------|-------------------------------------------------------------------------------|-----------|
| 1   | $Ste2^{300\Delta}$ (endocytosis of receptor Ste2 is impaired)     | G protein activation levels up                     | $k3=0.08$                                                                     | Ref.12    |
| 2   | treated with cycloheximide(synthesis inhibitor)                   | G protein cycle is closed down                     | $k31=k32=k44=k4=k9=0$                                                         | Ref.12    |
| 3   | $SST2\Delta$                                                      | super-sensitivity upon pheromone induction         | $k44=0$                                                                       | Ref.8     |
| 4   | $2 \times SST2$                                                   | response upon pheromone reduces                    | $k44=64, [Sst2]_{t=0}=500 \text{ nM}$                                         | Ref.8     |
| 5   | $2 \times G\beta\gamma$                                           | super-sensitivity to pheromone induction           | $[G\beta\gamma]_{t=0} = 1000 \text{ nM}$                                      | Ref.8     |
| 6   | negative feedbacks are cut down                                   | activation of Fus3pp doesn't attenuate with time   | $k26=k27=k31=k44=0$                                                           |           |
| 7   | dissociating speed for hyper-phosphorylated Ste7pp is slowed down | activation of Fus3pp doesn't attenuate with time   | $** \text{ of } f'_{KK} = 0.5$                                                |           |
| 8   | dissociating speed for normal Ste7pp is enhanced                  | activation of Fus3pp decreases                     | $** \text{ of } f_{KK} = 20$                                                  |           |
| 9   | shuttle of the scaffold Ste5 is cut down                          | super-sensitivity to pheromone induction           | $k22=k23=0$                                                                   |           |
| 10  | Ste11 is continuously activated                                   | Ste7pp is activated while Fus3pp is repressed down | $[Ste11pp]_{t=0} = 100 \text{ nM}, d[Ste11pp]/dt=0, [\alpha\text{-factor}]=0$ |           |
| 11  | Ste7 is continuously activated                                    | Fus3pp isn't activated                             | $[Ste7pp]_{t=0} = 100 \text{ nM}, d[Ste7pp]/dt=0, [\alpha\text{-factor}]=0$   | Ref.46    |

**ODE functions:**

$$\begin{aligned} \frac{d[Ste2]}{dt} &= -k1[\alpha - factor][Ste2] + k2[Ste2_{active}] - k7[Ste2] + \frac{k4[Ste12_{active}]^2}{k5^2 + [Ste12_{active}]^2} + k6 \\ \frac{d[Ste2_{active}]}{dt} &= k1[\alpha - factor][Ste2] - k2[Ste2_{active}] - k3[Ste2_{active}] \\ \frac{d[Sst2_{active}]}{dt} &= \frac{k44[Ste12_{active}]^2}{k45^2 + [Ste12_{active}]^2} - k46[Sst2_{active}] \\ \frac{d[G]}{dt} &= -k8[Ste2_{active}][G] + k15[G_{\alpha}d][G_{\beta}\gamma] + \frac{k9[Ste12_{active}]^2}{k10^2 + [Ste12_{active}]^2} - k12[G] + k11 \\ \frac{d[G_{\alpha}t]}{dt} &= k8[Ste2_{active}][G] - k13[G_{\alpha}t] - k14[G_{\alpha}t][Sst2_{active}] \\ \frac{d[G_{\alpha}d]}{dt} &= k13[G_{\alpha}t] + k14[G_{\alpha}t][Sst2_{active}] - k15[G_{\alpha}d][G_{\beta}\gamma] \\ \frac{d[G_{\beta}\gamma]}{dt} &= \\ k8 \frac{d[Ste2_{active}][G] - k15[G_{\alpha}d][G_{\beta}\gamma] - k40[G_{\beta}\gamma][Far1pp_{out}] + k41[Far1ppG_{\beta}\gamma] - k16[Ste5_{out}][G_{\beta}\gamma] + k17G_{\beta}\gamma Ste5 - k18[G_{\beta}\gamma][Ste20] + k19G_{\beta}\gamma Ste20}{d[Ste20]} &= -k18[G_{\beta}\gamma][Ste20] + k19G_{\beta}\gamma Ste20 - k18[Ste20]G_{\beta}\gamma Ste5 + k19C1 \\ \frac{d[MAPK - P_{out}]}{dt} &= -a1_K[Fus3p][MAPK - P_{out}] + (d1_K + p1_K)[Fus3pMAPK - P] - a2_K[Fus3pp_{out}][MAPK - P_{out}] + (p2_K + \\ d2_K)[Fus3ppMAPK - P] + \frac{k31[Ste12_{active}]^2}{k5^2 + [Ste12_{active}]^2} \\ \frac{d[Fus3_{in}]}{dt} &= -k47[Fus3_{in}] + k48[Fus3_{out}] + p1_K[Fus3p_{in}MAPK - P] \\ \frac{d[Fus3pp_{in}MAPK - P]}{dt} &= a2_K[Fus3pp_{in}][MAPK - P_{in}] - d2_K[Fus3pp_{in}MAPK - P] - p2_K[Fus3pp_{in}MAPK - P] \\ \frac{d[Ste11]}{dt} &= p1_{KKK}[Ste11pMEKK - P] + of_{f_{KKK}}(C2 + C8 + C11 + C12 + C15 + C20 + C22 + C23 + C26) - on_{KKK}[Ste11](C4 + C6 + C7 + \\ C1 + C16 + C17 + C18 + C19 + C5) - k26[Ste11][Fus3pp] \\ \frac{d[Fus3p_{in}MAPK - P]}{dt} &= a1_K[Fus3p_{in}][MAPK - P_{in}] - d1_K[Fus3p_{in}MAPK - P] - p1_K[Fus3p_{in}MAPK - P] \\ \frac{d[Ste11p]}{dt} &= -a1_{KKK}[Ste11p](W1 - [Ste11pMEKK - P] - [Ste11ppMEKK - P]) + d1_{KKK}[Ste11pMEKK - P] + p2_{KKK}[Ste11ppMEKK - P] \\ \frac{d[Ste11pMEKK - P]}{dt} &= a1_{KKK}[Ste11p](W1 - [Ste11pMEKK - P] - [Ste11ppMEKK - P]) - (d1_{KKK} + p1_{KKK})[Ste11pMEKK - P] \\ \frac{d[Fus3p_{in}]}{dt} &= p2_K[Fus3pp_{in}MAPK - P] - a1_K[Fus3p_{in}][MAPK - P_{in}] + d1_K[Fus3p_{in}MAPK - P] \\ \frac{d[Ste11pp]}{dt} &= -a2_{KKK}[Ste11pp](W1 - [Ste11pMEKK - P] - [Ste11ppMEKK - P]) + d2_{KKK}[Ste11ppMEKK - P] - a3_{KKK}[Ste11pp][Ste7] + \\ (d3_{KKK} + p3_{KKK})[Ste11ppSte7] - a4_{KKK}[Ste11pp][Ste7p] + (d4_{KKK} + p4_{KKK})[Ste11ppSte7p] + * * of_{f_{KKK}}(C3 + C10 + C9 + C13 + C14 + C21 + \\ C24 + C25 + C27) - * * on_{KKK}[Ste11pp](C1 + C4 + C5 + C6 + C7 + C16 + C17 + C18 + C19) \\ \frac{d[Ste11ppMEKK - P]}{dt} &= a2_{KKK}[Ste11pp](W1 - [Ste11pMEKK - P] - [Ste11ppMEKK - P]) - (d2_{KKK} + p2_{KKK})[Ste11ppMEKK - P] \\ \frac{d[Ste7]}{dt} &= -a3_{KKK}[Ste7][Ste11pp] + d3_{KKK}[Ste11ppSte7] + p1_{KK}[Ste7pMEK - P] + of_{f_{KK}}(C4 + C8 + C9 + C16 + C19 + C20 + C21 + C23 + \\ C25) - on_{KK}[Ste7](C1 + C2 + C3 + C6 + C7 + C12 + C13 + C14 + C15) - k24[Ste7][Fus3_{out}] + k25[Fus3Ste7] \\ \frac{d[Ste11ppSte7]}{dt} &= a3_{KKK}[Ste11pp][Ste7] - (d3_{KKK} + p3_{KKK})[Ste11ppSte7] \\ \frac{d[Ste7p]}{dt} &= -a1_{KK}(W2 - [Ste7pMEK - P] - [Ste7ppMEK - P])[Ste7p] + d1_{KK}[Ste7pMEK - P] + p3_{KK}[Ste11ppSte7] - \\ a4_{KK}[Ste7p][Ste11pp] + d4_{KK}[Ste11ppSte7p] + p2_{KK}[Ste7ppMEK - P] \\ \frac{d[Ste7pMEK - P]}{dt} &= a1_{KK}[Ste7p](W2 - [Ste7pMEK - P] - [Ste7ppMEK - P]) - (d1_{KK} + p1_{KK})[Ste7pMEK - P] \\ \frac{d[Ste11ppSte7p]}{dt} &= a4_{KK}[Ste11pp][Ste7p] - (d4_{KK} + p4_{KK})[Ste11ppSte7p] \\ \frac{d[Ste5_{out}]}{dt} &= -k16[Ste5_{out}](G_{\beta}\gamma + G_{\beta}\gamma Ste20) + kl7(C1 + G_{\beta}\gamma Ste5) + k22[Ste5_{in}] - k23[Ste5_{out}] \\ \frac{d[Ste12_{active}]}{dt} &= \frac{k28[Fus3pp_{in}]}{k29 + [Fus3pp_{in}]} - k30[Ste12_{active}] \\ \frac{d[Far1_{in}]}{dt} &= \frac{k33[Ste12_{active}]^2}{k34^2 + [Ste12_{active}]^2} - k36[Far1_{in}][Fus3pp_{in}] - k35[Far1_{in}] + k37[Far1pp_{in}] \\ \frac{d[Far1pp_{in}]}{dt} &= k36[Far1_{in}][Fus3pp_{in}] - k37[Far1pp_{in}] - k38[Far1pp_{in}] + k39[Far1pp_{out}] - k43[Far1pp_{in}][Cdc28] + k42[Far1ppCdc28] \\ \frac{d[Far1ppG_{\beta}\gamma]}{dt} &= k40[G_{\beta}\gamma][Far1pp_{out}] - k41[Far1ppG_{\beta}\gamma] \\ \frac{d[Cdc28]}{dt} &= k42[Far1ppCdc28] - k43[Far1pp_{in}][Cdc28] \\ \frac{d[Far1ppCdc28]}{dt} &= -k42[Far1ppCdc28] + k43[Far1pp_{in}][Cdc28] \\ \frac{d[Ste7pp]}{dt} &= -a2_{KK}[Ste7pp](W2 - [Ste7pMEK - P] - [Ste7ppMEK - P]) + d2_{KK}[Ste7ppMEK - P] + p4_{KK}[Ste11ppSte7p] - \\ a3_K[Ste7pp][Fus3_{out}] + (d3_K + p3_K)[Ste7ppFus3] - a4_K[Ste7pp][Fus3p] + (d4_K + p4_K)[Ste7ppFus3p] + * * of_{f_{KK}}(C5 + C10 + C11 + C17 + \\ C22 + C24) + * * of_{f_{KK}}(C18 + C26 + C27) - k27[Ste7pp] \\ \frac{d[Ste7ppMEK - P]}{dt} &= a2_{KK}[Ste7pp](W2 - [Ste7pMEK - P] - [Ste7ppMEK - P]) - (d2_{KK} + p2_{KK})[Ste7ppMEK - P] \\ \frac{d[Fus3_{out}]}{dt} &= -a3_K[Ste7pp][Fus3_{out}] + d3_K[Ste7ppFus3] + p1_K[Fus3pMAPK - P] + of_{f_K}(C6 + C12 + C13 + C16 + C17 + C20 + C21 + \\ C22 + C24) - on_K[Fus3_{out}](C1 + C2 + C3 + C4 + C5 + C8 + C9 + C10 + C11) - k24[Ste7][Fus3_{out}] + k25[Fus3Ste7] + k47[Fus3_{in}] - \\ k48[Fus3_{out}] + \frac{k32[Ste12_{active}]^2}{k5^2 + [Ste12_{active}]^2} \\ \frac{d[Ste7ppFus3]}{dt} &= a3_K[Ste7pp][Fus3_{out}] - (d3_K + p3_K)[Ste7ppFus3] \\ \frac{d[Fus3p]}{dt} &= \\ -a1_K[Fus3p][MAPK - P_{out}] + d1_K[Fus3pMAPK - P] + p3_K[Ste7ppFus3] - a4_K[Ste7pp][Fus3p] + d4_K[Ste7ppFus3p] + p2_K[Fus3ppMAPK - P] \\ \frac{d[Fus3pMAPK - P]}{dt} &= a1_K[Fus3p][MAPK - P_{out}] - (d1_K + p1_K)[Fus3pMAPK - P] \\ \frac{d[Ste7ppFus3p]}{dt} &= a4_K[Ste7pp][Fus3p] - (d4_K + p4_K)[Ste7ppFus3p] \end{aligned}$$

$$\begin{aligned}
\frac{d[Fus3pp_{out}]}{dt} &= -a_{2K}[Fus3pp_{out}][MAPK - P_{out}] + d_{2K}[Fus3ppMAPK - P] + p_{4K}[Ste7ppFus3p] + **off_K(C7 + C14 + C15 + C18 + C19 + \\
&C23 + C25 + C26 + C27) + k_{49}[Fus3pp_{in}] - k_{50}[Fus3pp_{out}] \\
\frac{d[Fus3ppMAPK - P]}{dt} &= a_{2K}[Fus3pp_{out}][MAPK - P_{out}] - (d_{2K} + p_{2K})[Fus3ppMAPK - P] \\
\frac{dC1}{dt} &= -C1(on_{KKK}[Ste11] + **on_{KKK}[Ste11pp] + on_{KK}[Ste7] + on_K[Fus3_{out}]) + off_{KKK}C2 + **off_{KKK}C3 + off_{KK}C4 + ** \\
&off_{KK}C5 + off_{KK}C6 + **off_{KK}C7 + k_{18}[Ste20][G_{\beta\gamma}Ste5] - k_{19}C1 + k_{16}[G_{\beta\gamma}Ste20][Ste5_{out}] - k_{17}C1 \\
\frac{dC2}{dt} &= on_{KKK}C1[Ste11] - off_{KKK}C2 - p_{KKK}C2 - on_{KK}[Ste7]C2 - on_K[Fus3_{out}]C2 + off_{KK}C8 + **off_{KK}C11 + off_{KK}C12 + **off_{KK}C15 \\
\frac{dC3}{dt} &= **on_{KKK}[Ste11pp]C1 + p_{KKK}C2 - on_{KK}[Ste7]C3 - on_K[Fus3_{out}]C3 + off_{KK}C9 + **off_{KK}C10 + off_{KK}C13 + **off_{KK}C14 - **off_{KKK}C3 \\
\frac{dC4}{dt} &= \\
\frac{dC5}{dt} &= on_{KK}C1[Ste7] - off_{KK}C4 - on_{KKK}[Ste11]C4 - **on_{KKK}C4[Ste11pp] - on_K[Fus3_{out}]C4 + off_{KKK}C8 + **off_{KKK}C9 + off_{KK}C16 + **off_{KK}C19 \\
\frac{dC6}{dt} &= -**on_{KKK}[Ste11pp]C5 - on_{KKK}[Ste11]C5 - on_K[Fus3_{out}]C5 + **off_{KKK}C10 + off_{KKK}C11 + off_{KK}C17 + **off_{KK}C18 - **off_{KKK}C5 \\
\frac{dC7}{dt} &= -**on_{KKK}[Ste11pp]C6 + on_KC1[Fus3_{out}] - off_{KK}C6 - on_{KKK}[Ste11]C6 - on_{KK}[Ste7]C6 + off_{KKK}C12 + **off_{KKK}C13 + \\
&off_{KK}C16 + **off_{KK}C17 \\
\frac{dC8}{dt} &= -**on_{KKK}[Ste11pp]C7 - on_{KKK}[Ste11]C7 - on_{KK}[Ste7]C7 + **off_{KKK}C14 + off_{KKK}C15 + **off'_{KK}C18 + off_{KK}C19 - **off_{KK}C7 \\
\frac{dC9}{dt} &= -p_{KKK}C8 - on_K[Fus3_{out}]C8 - (off_{KKK} + off_{KK})C8 + on_{KKK}[Ste11]C4 + on_{KK}[Ste7]C2 + off_{KK}C20 + **off_{KK}C23 \\
\frac{dC10}{dt} &= **on_{KKK}C4[Ste11pp] - p_{KK}C9 - (**off_{KKK} + off_{KK})C9 - on_K[Fus3_{out}]C9 + on_{KK}[Ste7]C3 + off_{KK}C21 + **off_{KK}C25 + p_{KKK}C8 \\
\frac{dC11}{dt} &= **on_{KKK}[Ste11pp]C5 - (**off_{KKK} + **off_{KK})C10 - on_K[Fus3_{out}]C10 + off_{KK}C24 + **off_{KK}C27 + p_{KKK}C11 + p_{KK}C9 \\
\frac{dC12}{dt} &= -p_{KKK}C11 - (off_{KKK} + **off_{KK})C11 - on_K[Fus3_{out}]C11 + on_{KKK}[Ste11]C5 + off_{KK}C22 + **off_{KK}C26 \\
\frac{dC13}{dt} &= -p_{KKK}C12 - on_{KK}[Ste7]C12 - (off_{KKK} + off_{KK})C12 + on_{KKK}[Ste11]C6 + on_K[Fus3_{out}]C2 + off_{KK}C20 + **off_{KK}C22 \\
\frac{dC14}{dt} &= **on_{KKK}[Ste11pp]C6 - (**off_{KKK} + off_{KK})C13 - on_{KK}[Ste7]C13 + on_K[Fus3_{out}]C3 + off_{KK}C21 + **off_{KK}C24 + p_{KKK}C12 \\
\frac{dC15}{dt} &= **on_{KKK}[Ste11pp]C7 - (**off_{KKK} + **off_{KK})C14 - on_{KK}[Ste7]C14 + off_{KK}C25 + **off'_{KK}C27 + p_{KKK}C15 \\
\frac{dC16}{dt} &= -p_{KKK}C15 - (off_{KKK} + **off_{KK})C15 - on_{KK}[Ste7]C15 + on_{KKK}[Ste11]C7 + off_{KK}C23 + **off'_{KK}C26 \\
\frac{dC17}{dt} &= -**on_{KKK}[Ste11pp]C16 - on_{KKK}[Ste11]C16 - (off_{KK} + off_{KK})C16 + on_{KK}[Ste7]C6 + on_K[Fus3_{out}]C4 + off_{KKK}C20 + **off_{KKK}C21 \\
\frac{dC18}{dt} &= -**on_{KKK}[Ste11pp]C17 - p_KC17 - (**off_{KK} + off_{KK})C17 - on_{KKK}[Ste11]C17 + on_K[Fus3_{out}]C5 + off_{KKK}C22 + **off_{KKK}C24 \\
\frac{dC19}{dt} &= -**on_{KKK}[Ste11pp]C18 - (**off'_{KK} + **off_{KK})C18 - on_{KKK}[Ste11]C18 + off_{KKK}C26 + **off_{KKK}C27 + p_KC17 \\
\frac{dC20}{dt} &= -**on_{KKK}[Ste11pp]C19 - (off_{KK} + **off_{KK})C19 - on_{KKK}[Ste11]C19 + on_{KK}[Ste7]C7 + off_{KKK}C23 + **off_{KKK}C25 \\
\frac{dC21}{dt} &= -(off_{KKK} + off_{KK} + off_{KK})C20 - (p_{KKK})C20 + on_{KKK}[Ste11]C16 + on_{KK}[Ste7]C12 + on_K[Fus3_{out}]C8 \\
\frac{dC22}{dt} &= **on_{KKK}[Ste11pp]C16 - (**off_{KKK} + off_{KK} + off_{KK})C21 - (p_{KK})C21 + on_{KK}[Ste7]C13 + on_K[Fus3_{out}]C9 + p_{KKK}C20 \\
\frac{dC23}{dt} &= -(off_{KKK} + **off_{KK} + off_{KK})C22 - (p_{KKK} + p_K)C22 + on_{KKK}[Ste11]C17 + on_K[Fus3_{out}]C11 \\
\frac{dC24}{dt} &= -(off_{KKK} + off_{KK} + **off_{KK})C23 - (p_{KKK})C23 + on_{KKK}[Ste11]C19 + on_{KK}[Ste7]C15 \\
\frac{dC25}{dt} &= **on_{KKK}[Ste11pp]C17 - (**off_{KKK} + **off_{KK} + off_{KK})C24 - p_KC24 + on_K[Fus3_{out}]C10 + p_{KKK}C22 + p_{KK}C21 \\
\frac{dC26}{dt} &= **on_{KKK}[Ste11pp]C19 - (**off_{KKK} + off_{KK} + **off_{KK})C25 - p_{KK}C25 + on_{KK}[Ste7]C14 + p_{KKK}C23 \\
\frac{dC27}{dt} &= -(off_{KKK} + **off'_{KK} + **off_{KK})C26 - p_{KKK}C26 + on_{KKK}[Ste11]C18 + p_KC22 \\
\frac{dC28}{dt} &= **on_{KKK}[Ste11pp]C18 - (**off_{KKK} + **off'_{KK} + **off_{KK})C27 + p_{KKK}C26 + p_{KK}C25 + p_KC24 \\
\frac{d[Fus3Ste7]}{dt} &= k_{24}[Ste7][Fus3_{out}] - k_{25}[Fus3Ste7] \\
\frac{d[Ste5_{in}]}{dt} &= -k_{22}[Ste5_{in}] + k_{23}[Ste5_{out}] \\
\frac{d[Fus3pp_{in}]}{dt} &= -k_{49}[Fus3pp_{in}] + k_{50}[Fus3pp_{out}] - a_{2K}[Fus3pp_{in}][MAPK - P_{in}] + d_{2K}[Fus3pp_{in}MAPK - P] \\
\frac{d[MAPK - P_{in}]}{dt} &= -a_{1K}[Fus3p_{in}][MAPK - P_{in}] + (d_{1K} + p_{1K})[Fus3p_{in}MAPK - P] - a_{2K}[Fus3pp_{in}][MAPK - P_{in}] + (p_{2K} + \\
&d_{2K})[Fus3pp_{in}MAPK - P] + \frac{k_{31}[Ste12_{active}]^2}{k_{5^2} + [Ste12_{active}]^2} \\
\frac{d[Far1pp_{out}]}{dt} &= -k_{40}[Far1pp_{out}][G_{\beta\gamma}] + k_{41}[Far1ppG_{\beta\gamma}] + k_{38}[Far1pp_{in}] - k_{39}[Far1pp_{out}] \\
\frac{d[G_{\beta\gamma}Ste5]}{dt} &= k_{16}[G_{\beta\gamma}][Ste5_{out}] - k_{17}[G_{\beta\gamma}Ste5] - k_{18}[G_{\beta\gamma}Ste5][Ste20] + k_{19}[C1] \\
\frac{d[G_{\beta\gamma}Ste20]}{dt} &= -k_{16}[G_{\beta\gamma}Ste20][Ste5_{out}] + k_{17}[C1] + k_{18}[G_{\beta\gamma}][Ste20] - k_{19}[G_{\beta\gamma}Ste20]
\end{aligned}$$
